# Supplementary material
Source: Springer Nature journal article supplement (https://www.springermedizin.de/resource/supplementary/12885_2013_4633_MOESM7_ESM.pdf/9466896)

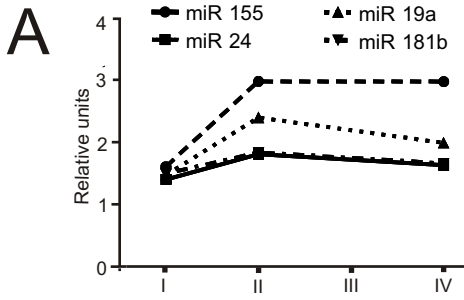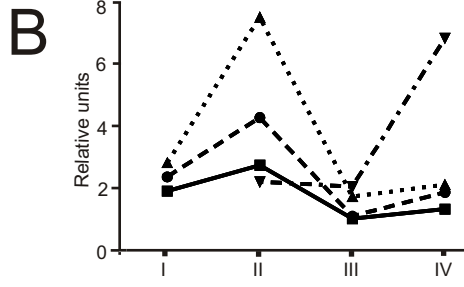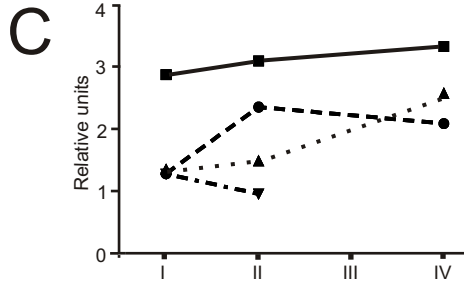

Supplement: MOESM7 [file 9466896]
